# Genome size dynamics in tribe Gilliesieae (Amaryllidaceae, subfamily Allioideae) in the context of polyploidy and unusual incidence of Robertsonian translocations

JAUME PELLICER<sup>1†</sup>, ORIANE HIDALGO<sup>1\*†</sup>, JAMES WALKER<sup>2</sup>, MARK W. CHASE<sup>1,3</sup>, MAARTEN J. M. CHRISTENHUSZ<sup>1,4</sup>, GORM SHACKELFORD<sup>5</sup>, ILIA J. LEITCH<sup>1</sup> and MICHAEL F. FAY<sup>1,3</sup>

<sup>1</sup>Royal Botanic Gardens, Kew, Richmond, Surrey TW9 3DS, UK

<sup>2</sup>Department of Cell and Developmental Biology, John Innes Centre, Norwich NR4 7UH, UK

<sup>3</sup>School of Plant Biology, University of Western Australia, Crawley, WA 6009, Australia

<sup>4</sup>Plant Gateway, 5 Talbot Street, Hertford, Hertfordshire SG13 7BX, UK

<sup>5</sup>Conservation Science Group, Department of Zoology, University of Cambridge, Cambridge CB2 3QZ, UK

Received 31 October 2016; revised 27 January 2017; accepted for publication 10 March 2017

This study focuses on tribe Gilliesieae (Amaryllidaceae, Allioideae), which stand out because of their karyotype diversity, constituting a textbook example of Robertsonian translocations (RTs), in which chromosomes fuse or break at the centromere. Polyploidy (i.e. whole genome duplication, WGD) is also common in the tribe, hence making Gilliesieae particularly suitable for investigating two major processes of genome evolution in an integrated way. Our phylogenetic reconstruction supported a two subtribe classification, Gilliesiinae and Leucocoryninae, the latter taxonomically validated in this paper. Leucocoryninae are composed of three well-supported lineages, corresponding to the genera *Leucocoryne* + *Latace*, blue-flowered (typical) *Ipheion* + *Tristagma* and *Nothoscordum* (including yellow-flowered *Ipheion* = *Beauverdia*). Analysis of the chromosome data in Leucocoryninae indicates that WGDs have resulted in an almost proportional genome size (GS) increase in *Leucocoryne*, in contrast to the reduction in monoploid GS in polyploid *Nothoscordum*. Likewise, contrasting patterns of GS dynamics and extraordinary karyotype diversity have been recovered in *Ipheion*, *Tristagma* and *Nothoscordum*, clearly illustrating the impact of RTs in shaping genome evolution in these plants.

ADDITIONAL KEYWORDS: ancestral trait reconstruction – C-value – fundamental chromosome number – karyotype – phylogeny.

## INTRODUCTION

Amaryllidaceae *sensu* APG IV (2016) belong to Asparagales and consist of three subfamilies: Amaryllidoideae (e.g. amaryllises, clivias, daffodils), Agapanthoideae (African bluebells) and Allioideae (e.g. chives, garlics, onions). The phylogenetic relationships between the three subfamilies have been extensively investigated (Fay & Chase, 1996; Meerow *et al.*, 1999; Fay *et al.*, 2000; Givnish *et al.*, 2006; Pires *et al.*, 2006;

Seberg *et al.*, 2012), often placing Amaryllidoideae and Allioideae as sister lineages, with Agapanthoideae as sister to both, although this relationship is weakly supported in most studies.

Allioideae consist of c. 14 genera and c. 600–700 species of rhizomatous or bulbous geophytes that can be recognized by their umbel-type inflorescences subtended by two bracts that enclose the inflorescence in a bud, a superior ovary, a solid style and frequent occurrence of thiosulphinates, including allicin (Block, 1985). Fay & Chase (1996) found that the former tribe Brodiaeae of Alliaceae s.s. were more closely related to families now placed in a broader Asparagaceae (APG

\*Corresponding author. E-mail: o.hidalgo@kew.org

†These authors contributed equally to this article.

IV, 2016). This lineage is therefore not discussed here, even though it was previously included in Alliaceae (e.g. Dahlgren, Clifford & Yeo, 1985), and some species of *Leucocoryne* Lindl. were originally described as members of *Brodiaea* Sm. or *Triteleia* Douglas ex Lindl.

Amaryllidaceae (as Alliaceae) were segregated into three subfamilies by Fay & Chase (1996): Allioideae, Gilliesioideae and Tulbaghioideae, with Allioideae sister to the other two subfamilies. However, since Alliaceae are now treated as a subfamily of Amaryllidaceae (APG IV, 2016), the taxonomic ranking of these subfamilies have been transferred to the tribe level: that is, Allieae, Gilliesieae and Tulbaghieae. Gilliesieae are bulbous herbs with a concentration of species in temperate South America. They have traditionally been divided into two main lineages, previously treated as tribes, but here treated as subtribes, namely Gilliesiinae and Leucocoryninae, with zygomorphic and actinomorphic flowers, respectively (Fig. 1; Rudall *et al.*, 2002). Leucocoryninae are nomenclaturally validated here: Leucocoryninae M.F.Fay & Christenh. subtrib. nov., and transferred from the full and direct reference to the type and Latin description of *Leucocoryne* Ravenna (*Onira* 5: 43. 2001: 43). Members of subtribe Leucocoryninae have a complex taxonomic history and the generic delimitation has been problematic in the past and continues to be so. These plants have linear leaves and scapose umbellate inflorescences sometimes reduced to a single flower (in *Ipheion* Raf.), with petaloid tepals often presenting a venation contrasting with the background colour (Fig. 1), which makes several of the species popular as garden ornamentals. Most commonly found in the bulb trade is *Ipheion uniflorum* Raf. (Fig. 1D, E), known by the common name of ‘spring starflower’. There are numerous cultivars, including ‘Rolf Fiedler’ that has been suggested to be a possible separate species (Castillo, 1986). Certainly, nomenclatural instability in Leucocoryninae has long plagued the horticultural trade. For example, *I. uniflorum* has been treated under *Beauverdia* Herter, *Brodiaea*, *Hookera* Salisb., *Leucocoryne*, *Milla* Cav., *Tristagma* Poepp. and *Triteleia* and some species have been more or less randomly placed in *Nothoscordum* Poepp. or *Tristagma* (Castillo, 1986). *Nothoscordum fragrans* Kunth has been included in *Allium* L., *Geboscon* Raf., *Hesperocles* Salisb., *Maligia* Raf., *Milla*, *Ornithogalum* L. and *Sowerbaea* Sm. (Rudall *et al.*, 2002; Fay & Chase, 2006; Fay, Rudall & Chase, 2006).

Past efforts using morphological and DNA sequence data have firmly confirmed the above-mentioned subdivision of Gilliesieae into two subtribes (Fay *et al.*, 2006). The latest revision of Gilliesiinae (Escobar, 2012) accepted the genera *Ancrumia* Harv. ex Baker, *Gethyum* Phil., *Gilliesia* Lindl., *Miersia* Lindl.,

*Schickendantziella* Speg., *Solaria* Phil., *Speea* Loes. and *Trichlora* Baker. The most recent circumscription of Leucocoryninae encompasses the genera *Beauverdia*, *Ipheion*, *Latace* Phil. [synonym *Zoellnerallium* Crosa (1975)], *Leucocoryne* (synonyms *Pabellonia* Quezada & Martic. and *Stemmatium* Phil.), *Nothoscordum* and *Tristagma* (Sassone, Arroyo-Leuenberger & Giussani, 2014; Sassone, Belgrano & Guaglianone, 2015). In the absence of apparent differences in floral morphology (Fig. 1), efforts have been made to differentiate between *Ipheion*, *Nothoscordum* and *Tristagma* by using subjectively delimited, continuously or discretely variable morphological character states, such as the degree of fusion of the tepals and the number of flowers per inflorescence (Guaglianone, 1972; Rahn, 1998). This often resulted in an artificial circumscription and classification of these genera, not necessarily reflecting evolutionary relationships within and between these genera. For example, in Leucocoryninae all species with one flower per inflorescence were previously placed in *Ipheion*. However, this character is now known to be homoplasious in the subtribe (Fay *et al.*, 2006; as ‘Ipheieae’).

Robertsonian translocation (RT) events, which involve either metacentric chromosome fission at the centromere to create two acrocentric chromosomes or fusion of two acrocentric chromosomes leading to a metacentric chromosome, are the most important type of rearrangements governing chromosomal evolution in animals, but are relatively uncommon in higher plants (Jones, 1998; Leitch *et al.*, 2010). Nonetheless, they have been reported frequently in Gilliesieae (Levan & Emswellers, 1938) and RT in *Nothoscordum* has been used as a classic example in the literature (Jones, 1998). Numerous studies have focused on different representatives of Gilliesieae (see Souza, 2012), leading to the identification of several bimodal karyotypes in the tribe, with metacentric chromosomes that are approximately twice as long as acrocentric chromosomes (Goldblatt, 1976; Jones, 1998; Souza *et al.*, 2009, 2016; Escobar, 2012). In addition, such studies have also provided evidence of the role that polyploidy has played in the evolution of some clades (e.g. Escobar, 2012; Souza, Crosa & Guerra, 2015). Gilliesieae therefore provide an ideal subject for an integrated investigation of how these two cytogenetic processes of RT and polyploidy can impact genome evolution.

Chromosomal evolution is intimately linked to changes in genome size (GS) and this trait has been shown to have a considerable impact on many aspects of the phenotype, ecology and evolution of plants (e.g. Greilhuber & Leitch, 2013). Evidence suggests that the vast majority of angiosperms have small genomes (1C ≤ 2.6 pg; Leitch *et al.*, 2010), the 1C-value being the amount of DNA in the nucleus of an unreplicated

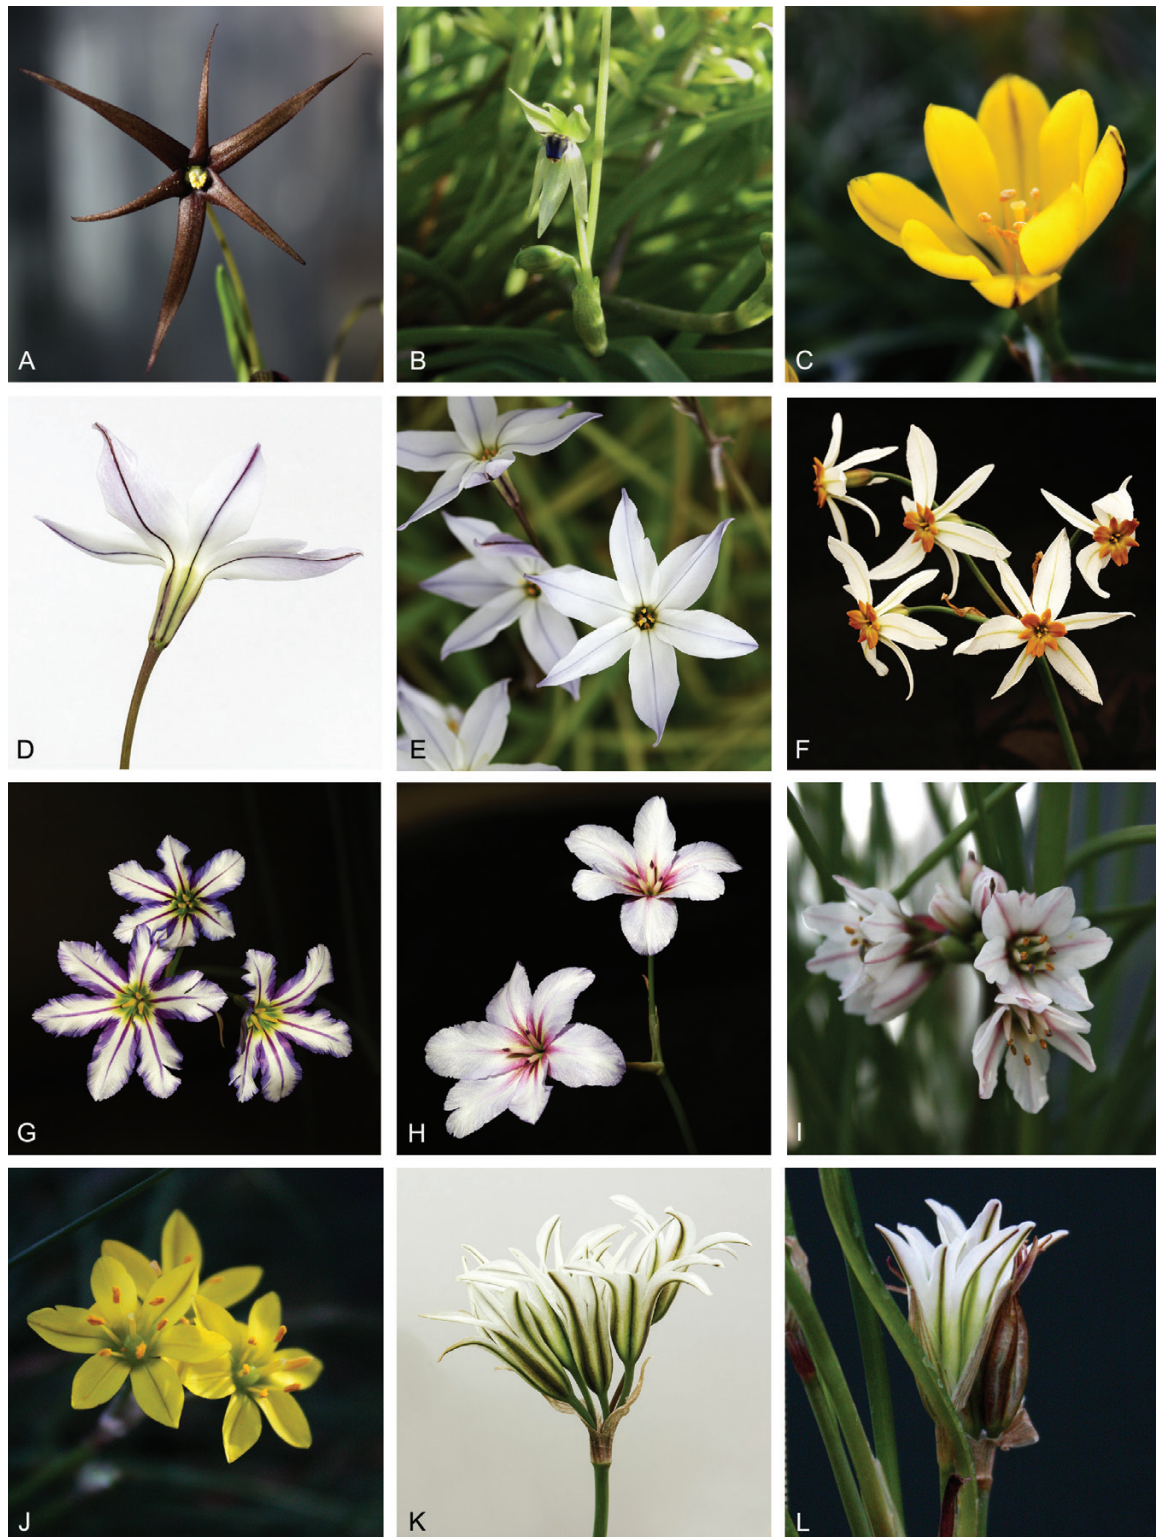

**Figure 1.** Floral diversity in specimens of Gilliesieae from the living collection of the Royal Botanic Gardens, Kew. Gilliesiinae. (A) *Gethyum atropurpureum*, (B) *Miersia chilensis*. Leucocoryninae. (C) *Ipheion dialystemon*, (D, E) *Ipheion uniflorum*, (F) *Leucocoryne narcissoides*, (G) *Leucocoryne pauciflora*, (H) *Leucocoryne purpurea*, (I) *Nothoscordum andicum*, (J) *Nothoscordum montevidense*, (K) *Tristagma bivalve*, (L) *Tristagma porrifolium*. [Photographs are, copyright © 2016, by Gorm Shackelford (D, E, F, G, H, K) and by Jaume Pellicer (A, B, C, I, J, L)].



gamete (Greilhuber *et al.*, 2005). Notwithstanding, a huge range of GSs has been encountered, spanning nearly 2400-fold (Leitch & Leitch, 2013). Large genomes have primarily been observed in monocots, with the largest values recorded so far in *Paris japonica* Franch. (Melanthiaceae, 1C = 152.2 pg; Pellicer, Fay & Leitch, 2010). Such diversity has been underpinned by polyploidy, whereby plants have more than two complete sets of chromosomes per cell (Leitch & Bennett, 1997) and by the amplification of non-coding repetitive DNA, such as transposable elements, present in high frequencies in plant genomes (Bennetzen & Wang, 2014). To understand better the underlying mechanisms maintaining the staggering diversity of GSs encountered in plants, it is thus necessary to continue gathering and documenting data across lineages. According to the most recent release of the Plant DNA C-values Database (Garcia *et al.*, 2014), there are GS estimates for 177 species in Alliioideae, but only two belong to Gilliesieae, so it is critical to fill these taxonomic gaps to have a clear picture of the overall diversity and dynamics of GS evolution in this lineage.

Bearing in mind previous reports of significant cytogenetic diversity in the group, we have conducted a survey across the tribe gathering karyotype and GS data, complemented with a robust new phylogenetic framework to (1) understand the evolutionary relationships among representatives of the tribe better, (2) assess the extent of both chromosome and GS diversity in Gilliesieae, (3) reconstruct ancestral character states for GS and karyological data and (4) provide further insights into the main pivotal processes driving genome evolution of the group.

## MATERIAL AND METHODS

### PLANT MATERIAL

All samples studied here were obtained from plants growing in the living collections held at the Royal Botanic Gardens, Kew (RBGK). Accession numbers corresponding to the species studied are given in Table 1. Whenever possible, herbarium vouchers were prepared and deposited in the herbarium of the Royal Botanic Gardens (K). For those accessions with few adult individuals, photographic vouchers were made, which are available from the authors upon request.

### CHROMOSOME COUNTS AND KARYOTYPE ANALYSIS

Root tips were collected from the same accessions for which GS was measured. These were pretreated in 0.05% colchicine solution at room temperature for 24 h and then fixed for at least 4 h in 3:1 absolute ethanol-glacial acetic acid at room temperature, before being

stored in this fixative at 4 °C for at least 24 h. For chromosome preparations, roots were removed from the fixative and rinsed in distilled water at room temperature for 1 min, hydrolyzed in 1 M HCl for 5–8 min at 60 °C and transferred to Feulgen (Schiff's) reagent at room temperature for 30 min before being squashed on a microscope slide in a drop of 45% acetic acid. The best metaphase plates were photographed with a ProgRes C14 plus digital camera (Jenoptik Corporation, Jena, Germany) mounted on an Axioplan 2 microscope (Zeiss, Oberkochen, Germany) and images were analysed with ProgRes CapturePro v.2.8.8 (Jenoptik Corporation). The chromosome number, ploidy, karyotype formula and fundamental number (FN, the number of chromosome arms) were determined on the basis of approximately five metaphase plates.

### GENOME SIZE ESTIMATION BY FLOW CYTOMETRY

Nuclear DNA contents were estimated following the one-step flow cytometry procedure described by Doležel, Greilhuber & Suda (2007). Briefly, c. 1 cm<sup>2</sup> of leaf material from both the individual being studied and the appropriate calibration standard, either *Pisum sativum* 'Ctirad' (2C = 9.09 pg) or *Allium cepa* 'Ailsa Craig' (2C = 34.89 pg) (Doležel *et al.*, 1998; Clark *et al.*, 2016), were chopped together using a new razor blade in a Petri dish containing 1 mL 'general purpose buffer' (GPB; Loureiro *et al.*, 2007) supplemented with 3% PVP-40. A further 1 mL GPB was added and the resulting suspension was filtered through a 30 µm nylon mesh and the nuclei stained with 100 µL propidium iodide (1 mg/mL). Samples were kept on ice for 15 min and the relative fluorescence of 5000 particles was then recorded using a Partec Cyflow SL3 flow cytometer (Partec GmbH, Münster, Germany) fitted with a 100 mW green solid-state laser (532 nm, Cobolt Samba, Solna, Sweden). Three leaves from different individuals were measured separately for each accession and three replicates of each leaf were processed. The output histograms were analysed with the FlowMax software v.2.4 (Partec GmbH).

### MOLECULAR PHYLOGENETIC RECONSTRUCTION

#### *DNA extraction, amplification and sequencing*

Total genomic DNA was extracted from silica-dried leaf material from 60 accessions of 25 species of Gilliesieae using the 2× CTAB method (Doyle & Doyle, 1987) with minor modifications. Samples were purified using Nucleospin DNA purification columns (QIAquick; Qiagen Ltd., Crawley, UK) according to the manufacturer's protocols. Total genomic DNA of *Tulbaghia ludwigiana* Harv. and *T. simmleri* Beauverd, used as out groups in the phylogenetic reconstruction, was

**Table 1.** List of species of Gilliesieae used in the present study for which nuclear DNA contents and chromosome values have been assessed

| Taxa                                            | RBGK accession number | 1C-value (SD) (pg) | 1Cx-value (pg)     | 2n              | Ploidy         | Karyotype formula | Fundamental number* |
|-------------------------------------------------|-----------------------|--------------------|--------------------|-----------------|----------------|-------------------|---------------------|
| Subtribe Gilliesiinae                           |                       |                    |                    |                 |                |                   |                     |
| <i>Gethyum atropurpureum</i> F.Phil.            | 1988-1970             | 19.94 (0.09)       | 19.95              | 14              | 2              | 4M + 4SM + 6A     | 22                  |
| <i>Gethyum atropurpureum</i>                    | 2008-1228             | 19.75 (0.07)       | 19.75              | 14              | 2              | 4M + 4SM + 6A     | 22                  |
| <i>Gilliesia graminea</i> Lindl.                | 1977-2342             | 19.25 (0.14)       | 19.25              | 14              | 2              | 4M + 4SM + 6A     | 22                  |
| <i>Gilliesia graminea</i>                       | 1977-1670             | 19.14 (0.14)       | 19.14              | 14              | 2              | 4M + 4SM + 6A     | 22                  |
| <i>Gilliesia montana</i> Poepp. & Endl.         | 2008-3044             | 19.90 (0.07)       | 19.91              | 14              | 2              | 4M + 4SM + 6A     | 22                  |
| <i>Miersia chilensis</i> Lindl.                 | 2003-3578             | 26.46 (0.29)       | 26.47              | 20              | 2              | 2M + 18A          | 22                  |
| <i>Solaria miersioides</i> F.Phil.              | 2008-3049             | 18.41 (0.12)       | 18.41              | 14              | 2              | 4M + 4SM + 6A     | 22                  |
| <i>Speea humilis</i> (Phil.) Loes. ex. K.Krause | 2008-1227             | 31.07 (0.14)       | 31.07              | 12              | 2              | 8M + 2SM + 2A     | 22                  |
| Subtribe Leucocoryninae                         |                       |                    |                    |                 |                |                   |                     |
| <i>Ipheion dialystemon</i> Guagl.               | 1984-3093             | 36.38 (0.27)       | 36.38              | 10              | 2              | 6M + 4A           | 16                  |
| <i>Ipheion dialystemon</i>                      | 1989-2632             | 36.12 (0.29)       | 36.12              | 10              | 2              | 6M + 4A           | 16                  |
| <i>Ipheion hirtellum</i> (Kunth) Traub.         | 1986-3905             | 21.35 (0.06)       | 21.35              | 10              | 2              | 6M + 4A           | 16                  |
| <i>Ipheion hirtellum</i>                        | 1987-3395             | 21.50 (0.10)       | 21.51              | 10              | 2              | 6M + 4A           | 16                  |
| <i>Ipheion sessile</i> (Phil.) Traub.           | 1985-2641             | 20.79 (0.08)       | 10.40              | 20              | 4              | 2SM + 18A         | 22                  |
| <i>Ipheion uniflorum</i> Raf.                   | 1994-160              | 21.40 (0.26)       | 10.70              | 24              | 4              | 4SM + 20A         | 28                  |
| <i>Ipheion uniflorum</i> 'Rolf Fiedler'         | 1981-2444             | 20.64 (0.16)       | 10.32              | 24              | 4              | –                 | –                   |
| <i>Ipheion uniflorum</i> 'Album'                | 1988-3378             | 10.32 (0.04)       | 10.32              | 12              | 2              | –                 | –                   |
| <i>Ipheion uniflorum</i> 'Jessie'               | 1994-159              | 20.48 (0.11)       | 10.24              | 24              | 4              | –                 | –                   |
| <i>Ipheion uniflorum</i> 'Violaceum'            | 1973-15748            | 10.37 (0.04)       | 10.37              | 12              | 2              | –                 | –                   |
| <i>Ipheion uniflorum</i> 'Charlotte Bishop'     | 2000-2528             | 10.39 (0.06)       | 10.39              | 12              | 2              | –                 | –                   |
| <i>Ipheion vittatum</i> (Griseb.) Traub.        | 2006-1196             | 19.95 (0.08)       | 19.95              | 10              | 2              | 6M + 4A           | 16                  |
| <i>Leucocoryne appendiculata</i> Phil.          | 2006-39               | 27.49 (0.11)       | 27.49              | 10 <sup>†</sup> | 2 <sup>†</sup> | –                 | –                   |
| <i>Leucocoryne coquimbensis</i> F.Phil. ex Phil | 1976-6116             | 60.64 (0.29)       | 30.32              | 18              | 4              | 14M + 2SM + 2A    | 34                  |
| <i>Leucocoryne coquimbensis</i>                 | 1987-4154             | 61.20 (0.56)       | 30.60              | 18              | 4              | 16M + 2A          | 34                  |
| <i>Leucocoryne coquimbensis</i>                 | 1960-67021            | 60.24 (0.42)       | 30.12              | 18 <sup>†</sup> | 4 <sup>†</sup> | –                 | –                   |
| <i>Leucocoryne coquimbensis</i>                 | 1976-3980             | 59.11 (0.17)       | 29.56              | 18 <sup>†</sup> | 4 <sup>†</sup> | –                 | –                   |
| <i>Leucocoryne coquimbensis</i>                 | 1990-857              | 60.00 (0.42)       | 30.00 <sup>†</sup> | 18 <sup>†</sup> | 4 <sup>†</sup> | –                 | –                   |
| <i>Leucocoryne coquimbensis</i>                 | 2006-38               | 27.87 (0.30)       | 27.87              | 10 <sup>†</sup> | 2 <sup>†</sup> | –                 | –                   |
| <i>Leucocoryne coquimbensis</i>                 | 1973-807              | 28.05 (0.29)       | 28.06              | 10              | 2              | 6M + 4A           | 16                  |
| <i>Leucocoryne incrassata</i> Phil.             | 2006-40               | 51.98 (0.15)       | 25.99              | 18 <sup>†</sup> | 4 <sup>†</sup> | –                 | –                   |
| <i>Leucocoryne ixiooides</i> Lindl.             | 2003-451              | 59.12 (0.70)       | 29.56              | 18              | 4              | 14M + 2SM + 2A    | 34                  |
| <i>Leucocoryne ixiooides</i>                    | 1973-6318             | 59.87 (0.12)       | 29.94              | 18              | 4              | –                 | –                   |
| <i>Leucocoryne ixiooides</i>                    | 1992-1304             | 57.82 (1.15)       | 28.91              | 18 <sup>†</sup> | 4 <sup>†</sup> | –                 | –                   |
| <i>Leucocoryne ixiooides</i>                    | 1977-2344             | 57.06 (1.20)       | 28.53              | 18 <sup>†</sup> | 4 <sup>†</sup> | –                 | –                   |
| <i>Leucocoryne macropetala</i> Phil.            | 2006-41               | 58.89 (0.05)       | 29.45              | 18 <sup>†</sup> | 4 <sup>†</sup> | –                 | –                   |
| <i>Leucocoryne narcissoides</i> Phil.           | 1987-4148             | 53.41 (0.43)       | 26.71              | 18              | 4              | 14M + 2SM + 2A    | 34                  |
| <i>Leucocoryne narcissoides</i>                 | 1992-1051             | 52.46 (0.75)       | 26.23 <sup>†</sup> | 18              | 4 <sup>†</sup> | –                 | –                   |
| <i>Leucocoryne cf. narcissoides</i>             | 1988-1966             | 79.32 (0.38)       | 26.44              | 26              | 6              | 22M + 4A          | 48                  |
| <i>Leucocoryne odorata</i> Lindl.               | 1987-3641             | 56.21 (0.18)       | 28.10              | 18 <sup>†</sup> | 4 <sup>†</sup> | –                 | –                   |
| <i>Leucocoryne pauciflora</i> Phil.             | 1991-8016             | 28.74 (0.12)       | 28.74              | 10 <sup>†</sup> | 2 <sup>†</sup> | –                 | –                   |
| <i>Leucocoryne pauciflora</i>                   | 1977-6731             | 27.89 (0.14)       | 27.90              | 10              | 2              | 6M + 4A           | 16                  |
| <i>Leucocoryne pauciflora</i>                   | 1973-793              | 28.17 (0.22)       | 28.17              | 10 <sup>†</sup> | 2 <sup>†</sup> | –                 | –                   |
| <i>Leucocoryne pauciflora</i>                   | 1977-6123             | 27.83 (0.11)       | 27.83              | 10 <sup>†</sup> | 2 <sup>†</sup> | –                 | –                   |
| <i>Leucocoryne pauciflora</i>                   | 1961-70601            | 27.96 (0.18)       | 27.96              | 10              | 2              | 6M + 4A           | 16                  |
| <i>Leucocoryne purpurea</i> Gay                 | 1998-2747             | 59.51 (0.12)       | 29.76              | 18              | 4              | 14M + 2SM + 2A    | 34                  |
| <i>Leucocoryne purpurea</i>                     | 2002-118              | 43.11 (0.26)       | 28.74              | 14              | 3              | 10M + 4A          | 24                  |
| <i>Leucocoryne vittata</i> Ravenna              | 2006-42               | 28.95 (0.11)       | 28.96              | 10 <sup>†</sup> | 2 <sup>†</sup> | –                 | –                   |
| <i>Nothoscordum andicolum</i> Kunth.            | 1986-104              | 32.29 (0.26)       | 32.29              | 10              | 2              | 8M + 2A           | 18                  |

Table 1. Continued

| Taxa                                                                        | RBGK accession number | 1C-value (SD) (pg) | 1Cx-value (pg) | 2n | Ploidy | Karyotype formula | Fundamental number* |
|-----------------------------------------------------------------------------|-----------------------|--------------------|----------------|----|--------|-------------------|---------------------|
| <i>Nothoscordum montevidense</i> subsp. <i>latitepalum</i> (Guagl.) Ravenna | 1985-2643             | 47.66 (0.12)       | 11.92          | 32 | 8      | 32M               | 64                  |
| <i>Nothoscordum montevidense</i> subsp. <i>minarum</i> (Beauverd) Ravenna   | 1976-3834             | 46.96 (0.22)       | 11.74          | 32 | 8      | 32M               | 64                  |
| <i>Nothoscordum</i> sp.                                                     | 2003-2563             | 28.72 (0.14)       | 14.36          | 18 | 4      | 14M + 4A          | 32                  |
| <i>Tristagma bivalve</i> (Hook. ex Lindl.) Traub                            | 1979-783              | 19.33 (0.14)       | 19.33          | 8  | 2      | 6M + 2A           | 14                  |
| <i>Tristagma nivale</i> Poepp.                                              | 1993-363              | 20.66 (0.11)       | 20.67          | 8  | 2      | 6M + 2A           | 14                  |
| <i>Tristagma porrifolium</i> (Poepp.) Traub                                 | 1988-1184             | 35.46 (0.11)       | 17.73          | 16 | 4      | –                 | –                   |
| <i>Tristagma porrifolium</i>                                                | 1988-8211             | 35.47 (0.22)       | 17.74          | 16 | 4      | 12M + 4A          | 28                  |

\*Fundamental number (FN) = number of chromosome arms.

†Values inferred based on the results found in either close relatives or different accessions from the same species.

supplied by the DNA & Tissue Collections, RBGK (ID 17512 and ID 17513, respectively). Two plastid regions (*matK* and *ndhF*) and one nuclear region (*ITS*) were amplified for each sample. The partial *matK* region was amplified using primers XF and 5R (Ford *et al.*, 2009) or, when that was not successful, with primers 390F and 1326R (Sun, McLewin & Fay, 2001). Two overlapping parts of the *ndhF* region were amplified using the primer pairs 32F/1318R and 1101F/2110R, respectively (Pires & Sytsma, 2002). Since we encountered problems amplifying the *ndhF* region in *Miersia chilensis* Lindl. and *Speea humilis* (Phil.) Loes. ex K. Krause, a set of specific primers was designed to carry out nested and half-nested amplifications for these taxa (Appendix S1). The *ITS* region was amplified using the primers 16SE and 27SE (Sun *et al.*, 1994). PCR amplifications were conducted in 25 µL reactions, using 22.5 µL Reddy PCR Master Mix (1.5 and 2.5 mM MgCl<sub>2</sub> for nuclear and plastid markers, respectively; ABgene, Epsom, Surrey, UK), 0.5 µL TBT-PAR mixture (*sensu* Samarakoon, Wang & Alford, 2013), 0.5 µL each primer (100 ng/µL) and 1 µL template DNA. PCR conditions were as follows. For *matK* we used: initial denaturation at 94 °C for 2 min 30 s, 30 cycles at 94 °C for 1 min, 50 °C for 1 min, 72 °C for 1 min 30 s and a final extension at 72 °C for 7 min. For *ndhF* we followed Pires & Sytsma (2002). For *ITS* and any unsuccessful amplifications of plastid DNA regions we used: initial denaturation at 80 °C for 5 min, followed by 35 cycles at 95 °C for 1 min, 48 °C for 1 min, 65 °C for 5 min and a final extension at 65 °C for 4 min. Resulting PCR products were purified using DNA purification columns (QIAquick; Qiagen Ltd., Crawley, UK) and sequenced using the Big Dye terminator v3.1 chemistry (ABI, Warrington, Cheshire, UK) on an ABI 3730 Genetic Analyser (ABI/Hitachi, Warrington, Cheshire, UK).

### Sequence editing, alignment and phylogenetic analysis

New DNA sequences and sequences downloaded from GenBank were edited using Geneious computer software version 7.1 (Biomatters Ltd., New Zealand). The data set of 96 accessions included (1) *ITS*, *ndhF* and *matK* sequences for two out group species and 60 Gilliesieae accessions from the living collection of RBGK representing 25 species, (2) *ITS*, *ndhF* and *matK* sequences from GenBank for 12 species and (3) *ITS* accessions for 22 species and subspecies from the recent study of Jara-Arancio *et al.* (2014). The plastid DNA data set was aligned manually, whereas *ITS* sequences were aligned on the Guidance web server (Penn *et al.*, 2010) using the MAFFT multiple sequence alignment algorithm (Katoh *et al.*, 2005), with 100 bootstrap repeats, a Max-Iterate of 1000 (long run) and a local pair refinement strategy. A combined Bayesian analysis was carried out with MrBayes v.3.1.2 (Ronquist & Huelsenbeck, 2003) on the CIPRES server (Miller, Schwartz & Pfeiffer, 2010). The data set was partitioned by region and, for *matK* and *ndhF*, also by codon position. The most appropriate models for nucleotide substitution were chosen with jModelTest 0.1 (Guindon & Gascuel, 2003; Posada, 2008), which were GTR + G for *matK* and *ndhF* and GTR + I + G for *ITS*. For each analysis, two concurrent runs of four Markov Chain Monte Carlo (MCMC) simulations each (one cold and three heated chains with a temperature of 0.2) were processed simultaneously for 18 × 10<sup>6</sup> generations and sampled every 700 generations. The data were then evaluated for convergence using Tracer v.1.6 (Rambaut & Drummond, 2007). Data from the first 5000 generations were discarded as the 'burn-in' period. The 50% majority rule consensus tree and posterior probabilities (PPs) of nodes were calculated from the pooled samples.



## RECONSTRUCTION OF ANCESTRAL CHARACTER STATES

*Reconstruction of ancestral GS values*

A sample of 1000 post-burn-in trees was filtered from the Bayesian phylogenetic analysis using BayesTrees v.1.3 (<http://www.evolution.rdg.ac.uk/BayesTrees.html>) and pruned to a selection of taxa restricted to the lowest ploidy available. After log transformation, ancestral 1Cx-values were reconstructed with BayesTraits v.2 (<http://www.evolution.rdg.ac.uk/BayesTraits.html>). The best-fitting model for analysis of continuous characters (i.e. directional vs. random walk) was chosen calculating the logarithm of the harmonic mean from five independent BayesFactor tests under the MCMC option. The settings used were as follows: sampling every 1000 generations, iterations =  $100 \times 10^6$ , burn-in =  $10 \times 10^6$  iterations, scaling parameters estimated = delta ( $\delta$ ), kappa ( $\kappa$ ) and lambda ( $\lambda$ ). The directional walk model was supported in most of the runs and the posterior distributions of the scaling parameters generated were used as the settings for the second phase of the analysis in which the ancestral 1Cx (Anc1Cx)-values of specific nodes were estimated with the addMRCA (most recent common ancestor) command. In addition, Anc1Cx-values were also reconstructed using maximum likelihood (ML) and maximum parsimony (MP). Character reconstruction under ML was performed using the fastAnc command and subsequently mapped onto the Bayesian consensus phylogram using the contMap command of Phytools package using R (Revell, 2012). For the MP reconstruction, we used Mesquite v.3.04 software (Maddison & Maddison, 2007).

*Reconstruction of ancestral chromosome numbers*

The probabilistic models of chromosome number evolution implemented in ChromEvol v.2 (Mayrose, Barker & Otto, 2010; Glick & Mayrose, 2014) were used to infer ancestral haploid ( $n$ ) chromosome numbers and haploid FN in Gilliesieae. Chromosome counts were obtained from the accessions used in the present study and complemented with available data from the literature (see Appendix S2). ChromEvol software implements ten models of chromosome number change to give an estimation of the number and type of evolutionary events taking place in a phylogenetic framework. Chromosome number transitions taken into account are dysploidy (gains and losses), duplication events (i.e. polyploidy, doubling of chromosome number) and demi-duplication (e.g. the result of a fusion between two gametes that have different ploidies). All models were fitted to the data using a Bayesian inference (BI) consensus phylogram pruned to a selection of taxa with reliable chromosome data. Each model was run for 10 000 simulations with the

data provided, with the maximum number of chromosomes set to ten times higher than the highest chromosome number in the data and the minimum being set to 1, with non-fixed root number. The model that best fitted the data set was chosen under the Akaike information criterion (AIC).

## RESULTS

## PHYLOGENETIC RECONSTRUCTION OF GILLIESIEAE

Nucleotide sequence data have been deposited in the DDBJ/EMBL/GenBank under the following accession numbers: LT718262–LT718323 for *matK*, LT718324–LT718387 for ITS and LT718388–LT718445 for *ndhF*. The phylogenetic tree resulting from the Bayesian analysis of the combined data set is presented in Figure 2. Separate analyses of the different markers did not reveal supported incongruence, with some exceptions restricted to the clade comprising *Gilliesia* and related genera (as previously discussed in Escobar, 2012). Our results support the division of the tribe into two major clades (i.e. subtribes Gilliesiinae and Leucocoryninae). Overall, we found strong phylogenetic support for most of the major clades, but failed to support the split between the clade containing *Tristagma* and the predominantly blue-flowered *Ipheion* and the clade containing *Nothoscordum* and the yellow-flowered *Ipheion*. The addition of multiple accessions yielded no major conflicts, but in the case of *Leucocoryne* many of the species fell in an unresolved polytomy due to the lack of sequence variation in the three markers.

## NUCLEAR DNA CONTENTS AND CHROMOSOME NUMBERS IN GILLIESIEAE

Here we report C-values for 27 species of Gilliesieae (Table 1), this study being the first attempt to survey GS evolution in the group. In general, flow cytometric profiles revealed high resolution histograms with 2C peaks for the target sample and the reference standard < 5% (CV% 2.23–4.75). At a given ploidy, variation in C-value from different accessions of the same species was low (< 2%), falling within the limits of intraspecific variation previously reported by Doležel & Bartoš (2005).

Overall, 1C-values in Gilliesieae varied 5.87-fold, ranging from 10.32 pg/1C in *I. uniflorum* ( $2n = 2x = 12$ ) to 60.64 pg/1C in *Leucocoryne coquimbensis* F.Phil. ex Phil. ( $2n = 4x = 18$ ). Note that we also found a polyploid sample of *Leucocoryne* cf. *narcissooides* Phil. ( $2n = 6x = 26$ ,  $1C = 79.32$  pg), with an even larger genome, but we do not include this value in our analyses since it is most likely the result of an artificial hybrid cross from cultivation.

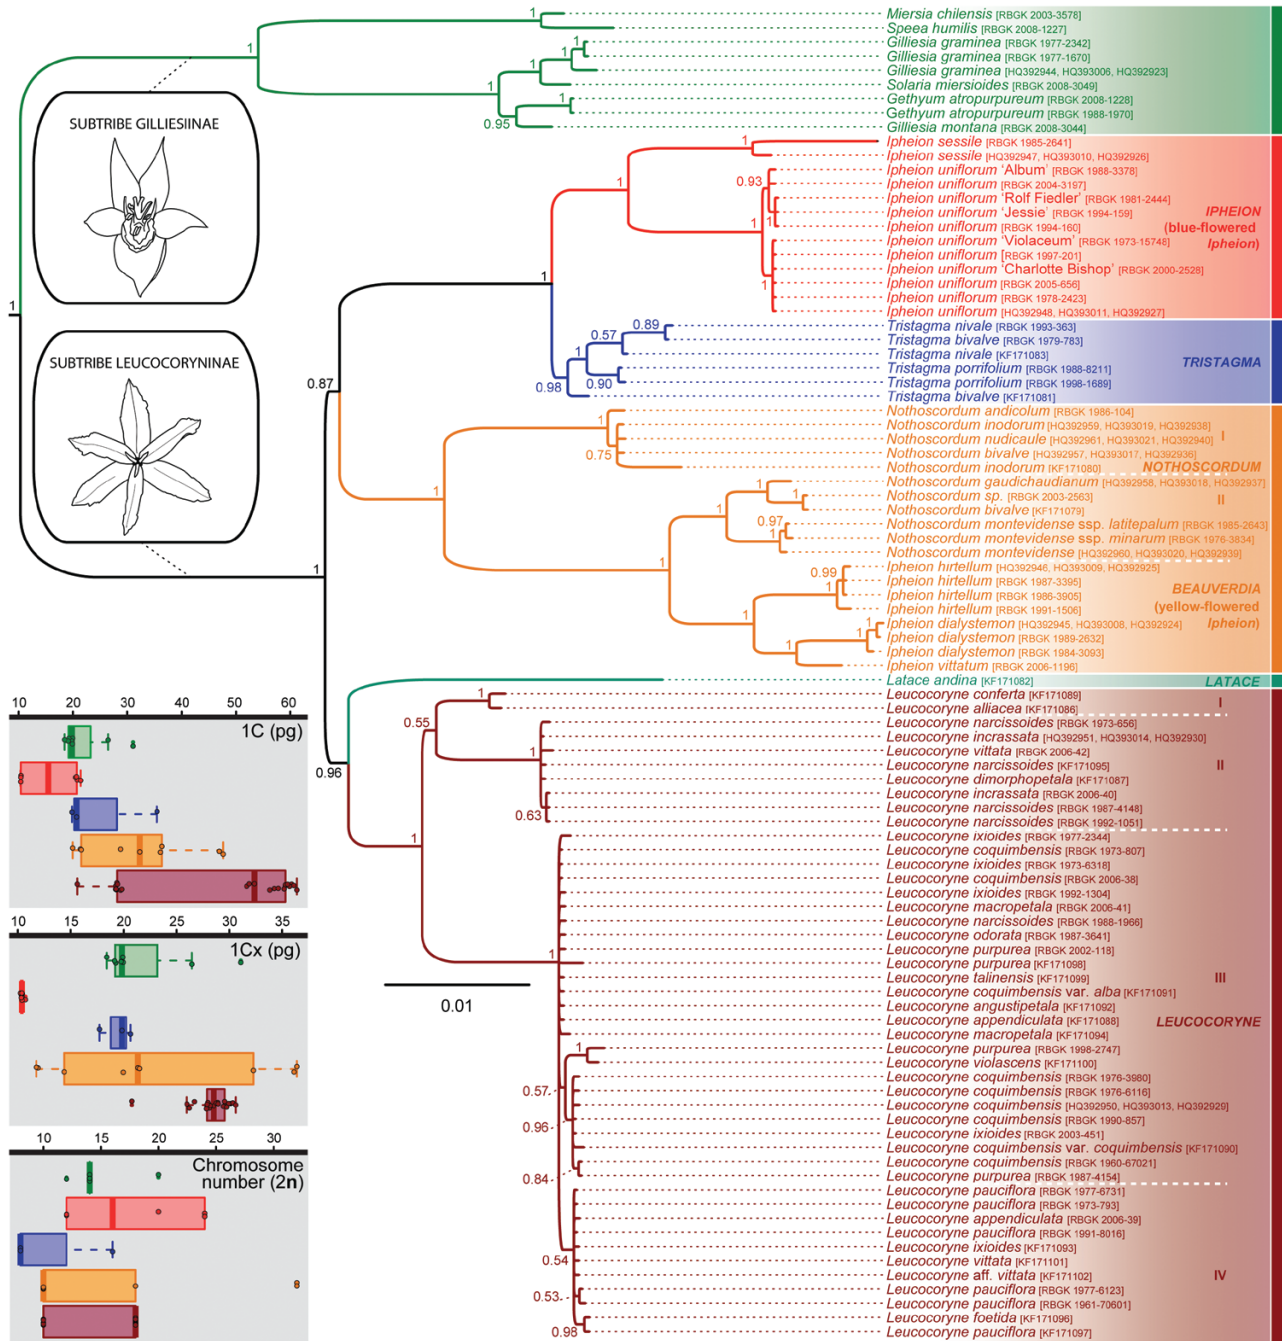

Downloaded from https://academic.oup.com/boi/advance-article/doi/10.1093/aob/abaa011/5797260 by guest on 23 April 2024

**Figure 2.** Majority-rule consensus phylogenetic tree of post-burn trees of Gilliesieae obtained through the Bayesian analysis of the ITS, *matK* and *ndhF* combined data set. Posterior probabilities (PPs) > 0.50 are indicated on nodes. Bottom left: boxplots with individual jitter values for accessions, depicting the distribution of 1C-values, 1Cx-values and chromosome numbers in each of the clades of Gilliesieae.

At the monoploid (1Cx)-level, *Nothoscordum s.l.* (including yellow-flowered *Ipheion*) was the most diverse among all genera studied (Table 1; Figs 2, 3). Monoploid (1Cx) GS showed contrasting patterns among polyploid series. For example, we observed a relatively proportional GS increase

across ascending ploidies in *Leucocoryne* (Fig. 3), supported by the relatively low variation of 1Cx-values (1Cx range 25.99–30.00 pg; Table 1), whereas genome downsizing was more apparent in polyploid *Nothoscordum* when compared to diploid species (1Cx range 11.74–32.29 pg).



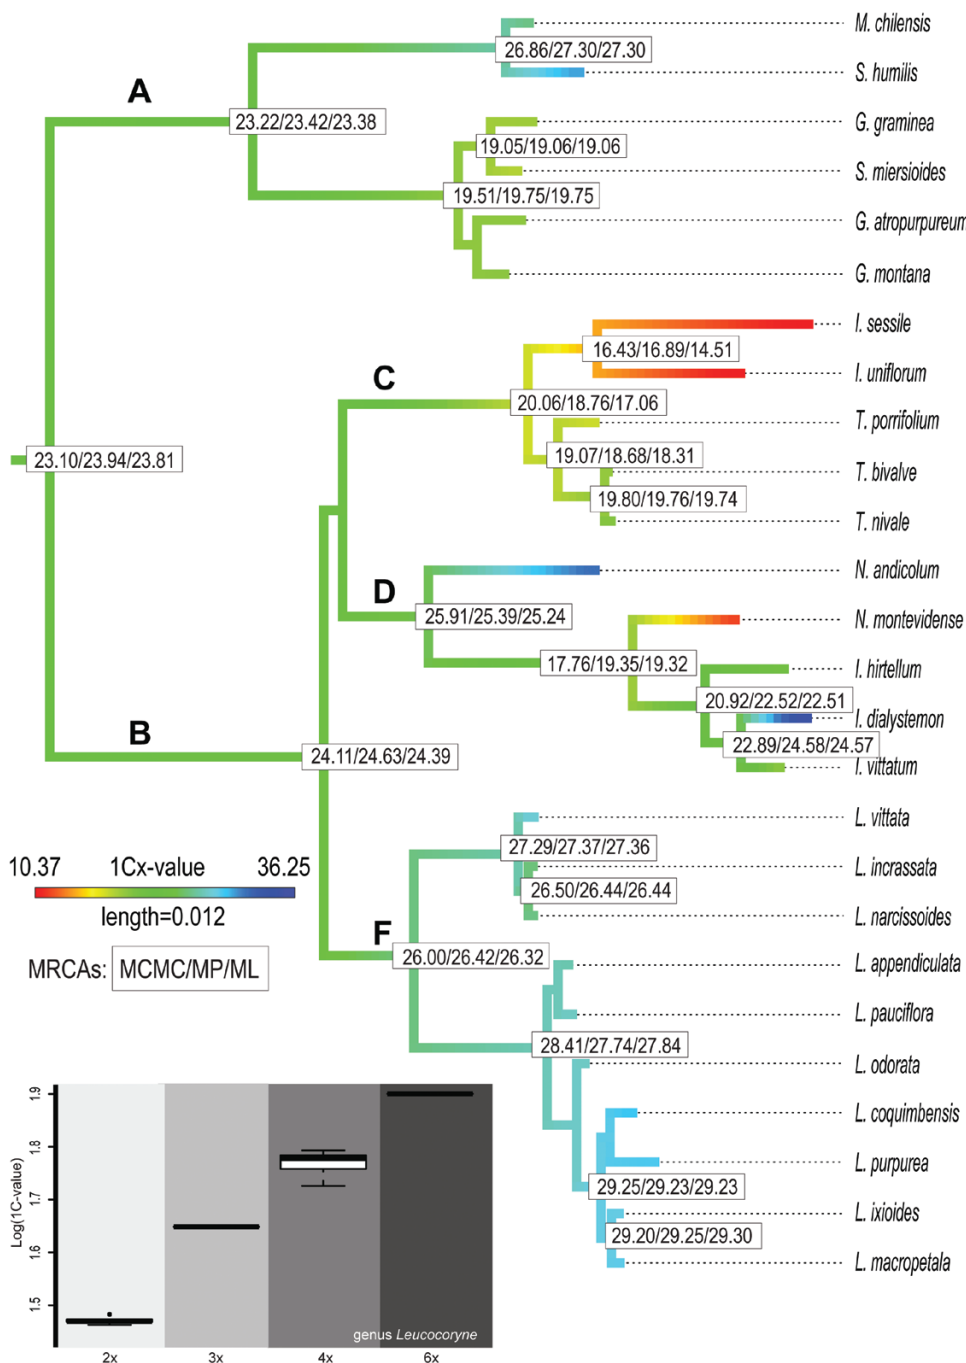

**Figure 3.** Ancestral genome size (1Cx) reconstruction in Gilliesieae. Values in boxes represent the actual 1Cx-values reconstructed using the different methods (i.e. Bayesian inference [MCMC]/maximum likelihood [ML] and maximum parsimony [MP]) for supported nodes (PP > 0.95). Bottom left: Illustrative boxplots depicting the range of 1Cx-values for each ploidy in *Leucocoryne*. PP, posterior probability.

Chromosome spreads were prepared de novo for most of the taxa studied (Table 1; Figure S1), although we also included previously published counts and karyotype data in further analyses (Figs 2, 4; Appendix S2). Chromosome numbers ranged

from  $2n = 8 = 6M + 2A$  [*Tristagma bivalve* (Hook. ex Lind.) Traub and *T. nivale* Poepp.; Fig. 4; Figures S1W, X] to  $2n = 32 = 32M$  (*Nothoscordum montevidense* Beauverd; Fig. 4; Figures S1T, U) and ploidies included  $2n = 2x, 3x, 4x, 6x$  and  $8x$  (Table 1; Fig. 4). A notable

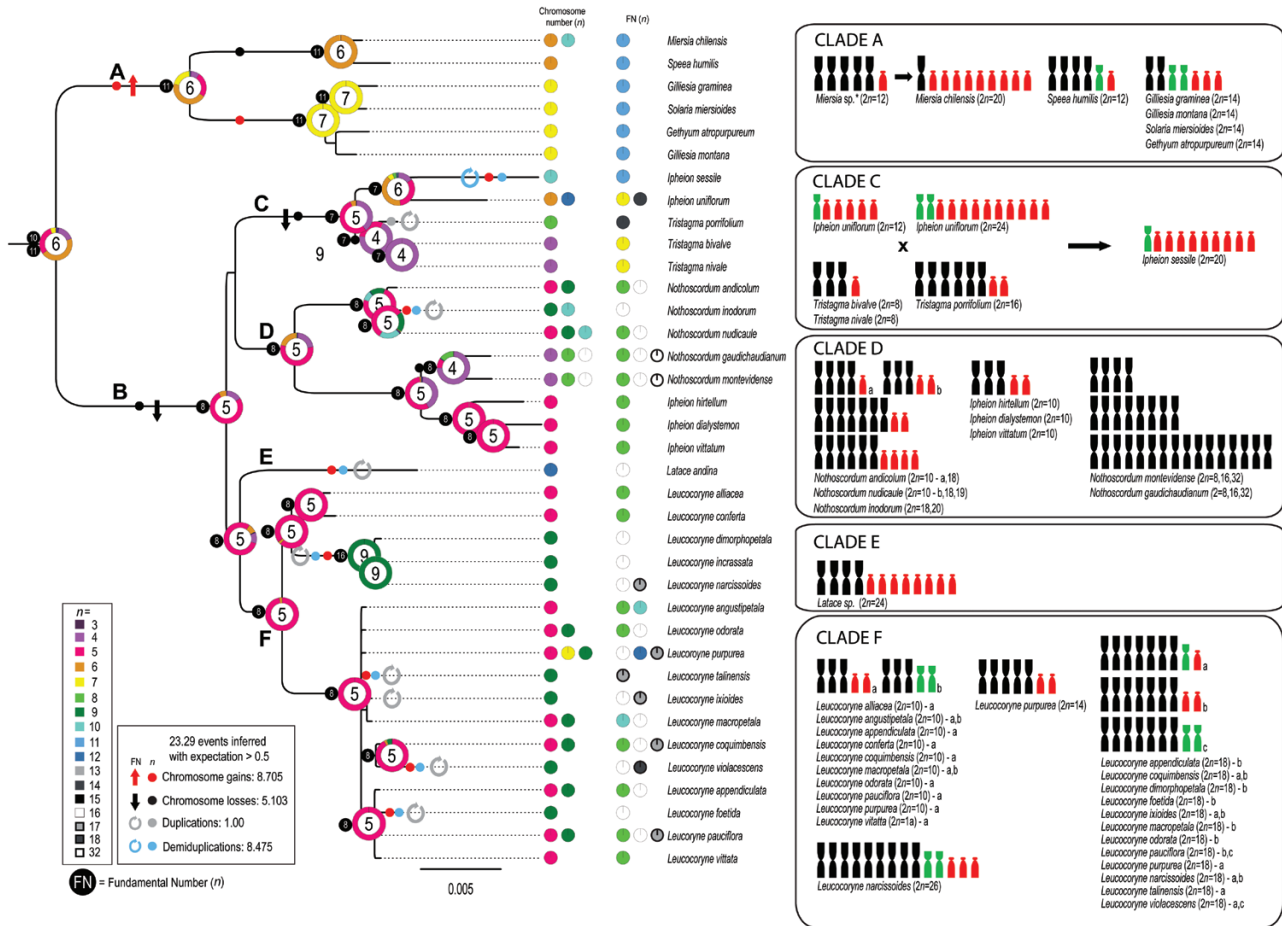

**Figure 4.** Chromosome and fundamental number (FN) reconstruction in Gilliesieae. Pie charts indicate haploid chromosome number and haploid FN. (i) Numbers inside the coloured pie charts at nodes represent the chromosome number with the highest probability. (ii) Numbers inside the black circles represent the FN reconstructed with the highest probability. As for the GS reconstruction, nodes lacking statistical support (PP < 0.95) were not considered for inferences. GS, genome size; PP, posterior probability.

range of karyotypes was recovered from the species studied (Fig. S1). The different karyotype formulae are detailed in Table 1 and, for illustrative purposes, schematic idiograms are depicted in Figure 4. Note that for a few species we could not determine their chromosome number; ploidy was therefore assigned on the basis of GS estimations.

ANCESTRAL GS AND CHROMOSOME RECONSTRUCTION IN GILLIESIEAE

The different methods used for GS reconstruction (MCMC, MP and ML) in Gilliesieae revealed relatively consistent inferred Anc1Cx-values and only minor differences were observed for the MRCAs of selected nodes (Fig. 3). Indeed, each of the methods tested showed comparable patterns of GS evolution and the inferred values recovered for the deep nodes

were highly congruent. For example, the MRCA of the tribe was reconstructed to have a 1Cx = 23.10–23.94 pg (Fig. 3) under different methods.

Contrasting dynamics of GS evolution were found to be more prevalent in *Ipheion s.l.*, *Nothoscordum* and *Tristagma* (Fig. 3, clades C and D) than in *Leucocoryne* (clade F). We inferred an overall trend of GS downsizing across the lineage including *Tristagma* and blue-flowered *Ipheion* with respect to their MRCA (Fig. 3, clade C). However, among *Nothoscordum* and yellow-flowered *Ipheion*, such a pattern was lacking, and a more heterogeneous result was observed (Figs 2, 3, clade D). *Leucocoryne* was largely characterized by an overall trend towards GS increase during its diversification (Fig. 3, clade F). Under the Bayesian approach, the Bayes factor log likelihood scores supported the directional model, with contrasting GS ups and downs during the evolution of the tribe (Fig. 3). A lambda (λ)

score of 0.98 indicated the influence of phylogenetic relationships in contributing to the recovered GS variation, which probably took place gradually [ $\kappa = 2.16$ ].

Of the models tested for chromosome evolution in Gilliesieae, the four-parameter 'M3' (Glick & Mayrose, 2014) was the best fit for our data based on the lowest AIC values for FN and haploid ( $n$ ) chromosome number. The results of the ancestral chromosome reconstructions using BI, their probabilities and the number of inferred chromosome events are depicted in Figure 4. Since the chromosome numbers and FN from BI and ML were consistent, only the results from BI are presented here. The MRCA of Gilliesieae was reconstructed to have a  $n = 6(5)$  and FN = 11(10) (Fig. 4), both haploid numbers and FN being reconstructed with relatively similar probabilities [i.e.  $n$ ;  $p(5) = 0.46$  and  $p(6) = 0.31$ ]. Although  $n = 6$  and FN = 11 were also recovered as the ancestral states for subtribe Gilliesiinae, in Leucocoryninae,  $n = 5$  was recovered with the highest probability for the MRCA, coupled with a reduction of the FN from 11/10 to 8 (Fig. 4, clade B). Although the evolution of haploid chromosome numbers in Leucocoryninae was not clearly dominated by any specific type of event, chromosome reductions (i.e. fusions) were more frequent among the clade including *Ipheion*, *Nothoscordum* and *Tristagma* (i.e. clades C and D), whereas demiduplications coupled with chromosome gains (i.e. fissions) dominated in *Leucocoryne* (clade F). Polyploid events (whole genome duplication, WGD) tended to be reconstructed in derived positions along the tree [e.g. in *Ipheion sessile* Traub. and *Tristagma porrifolium* (Poepp.) Traub.]. The results from the FN reconstruction, recovered a simpler scenario, with only a further reduction of FN in the MRCA of *Tristagma* and blue-flowered *Ipheion*, and WGDs scattered across *Leucocoryne* (Fig. 4, clade F).

## DISCUSSION

### GENERIC DELIMITATION AND RELATIONSHIPS IN TRIBE GILLIESIEAE

This new phylogenetic hypothesis based on the analysis of three markers includes the most extensive taxonomic sampling so far used for reconstructing evolutionary relationships in Gilliesieae. As expected, it resolves Gilliesiinae and Leucocoryninae as two distinct, well-supported clades, in agreement with former taxonomic treatments based on morphological data (e.g. Rudall *et al.*, 2002). Indeed, early molecular inferences already recovered these two clades (although only two taxa of Gilliesiinae were included in the analysis; Fay & Chase, 1996; Fay *et al.*, 2006), as did the more recent analysis of Escobar (2012) based on an

extended sampling focused on Gilliesiinae. Our efforts to compile, document and model karyological and cytogenetic traits across Gilliesieae enabled an evaluation of the phylogenetic signal of those characters at different taxonomic levels. Using these approaches, our results showed that GS values and chromosome numbers for Gilliesiinae fall within the overall ranges found in Leucocoryninae (see boxplots in Fig. 2), although each subtribe has its own set of distinctive karyotypes (Fig. 4).

Phylogenetic relationships in Gilliesiinae were largely congruent with Escobar (2012), revealing two main clades, one associating *Miersia* and *Speea* and the other including *Gilliesia* and related genera (Fig. 2). From the former, we only studied one species of *Miersia*, *M. chilensis*, but its karyotype, comprising nine acrocentric and one metacentric chromosome pairs ( $2n = 20$ ), contrasts strongly with those reported for other *Miersia* spp. studied, with  $2n = 12$ , comprising one pair of acrocentric and five pairs of metacentric chromosomes, and which are similar to the karyotype of *Speea* (Escobar, Ruiz & Baeza, 2012; Fig. 4). In the clade of *Gilliesia* and relatives, all studied individuals of *Gethyum*, *Gilliesia* and *Solaria* showed the same karyotype and chromosome number ( $2n = 14$ ); these are found nowhere else in the tribe (Fig. 4). This clade, although being particularly well defined on the basis of molecular and karyological data, is also particularly problematic for generic delimitation. Certainly, (1) it combines topological inconsistencies between markers for statistically supported nodes and (2) *Gilliesia* is shown to be paraphyletic in its present circumscription (Escobar, 2012; Fig. 2). A detailed taxonomic revision is clearly needed, especially since this clade includes the type species of the tribe, *G. graminea* Lindl. The strong karyological homogeneity observed in *Gilliesia* and related genera could maybe help justify a broader generic delimitation. However, before making any taxonomic rearrangements, it will be necessary to gain a more comprehensive understanding of the evolutionary relationships in Gilliesiinae and this can only be achieved by obtaining phylogenetic data for *Ancrumia*, *Schickendantziella* and *Trichlora*, which have so far not been included in any molecular studies.

In Leucocoryninae, our phylogenetic inference recovered the three main clades previously described by Fay *et al.* (2006) and recently recovered by Souza *et al.* (2016): (1) a clade in which blue-flowered *Ipheion* are sister to *Tristagma*; (2) a clade containing a paraphyletic *Nothoscordum* and yellow-flowered *Ipheion*; and (3) the *Leucocoryne* clade sister to *Latace* (Fig. 2). As in former studies, efforts were made to expand the taxonomic sampling, but this failed to help in disentangling relationships among these main clades. Based on these data, it is clear that blue- and yellow-flowered *Ipheion* spp. do not form a natural group, a conclusion also



supported by the karyological evidence (Figs 2, 4). For example, *I. sessile* (probably a hybrid between *I. uniflorum* and a member of *Tristagma*) and *I. uniflorum* (a representative of blue-flowered *Ipheion*) have karyotypes comprising only submetacentric and acrocentric chromosomes (Fig. 4), even though *I. uniflorum* shares the same FN multiple of 14 as *Tristagma*, suggesting that one karyotype could have easily evolved from the other through a RT event. In contrast, *I. dialystemon* Guagl., *I. hirtellum* (Kunth) Traub and *I. vittatum* (Griseb.) Traub (representatives of yellow-flowered *Ipheion*) have one of the only two karyotypes that are not genus specific in Leucocoryninae (i.e.  $n = 3M + 2A$ ); this is also found in some species of *Nothoscordum* and *Leucocoryne* (Fig. 4). Most representatives of the *Nothoscordum* clade have a FN of 16 (except in polyploid cytotypes, e.g. *N. andicum* Kunth; Fig. 4), a trait supporting the cohesion of this group, which otherwise shows considerable cytological diversity comprising seven karyotypes and an impressive range in  $1Cx$ -values (Figs 3, 4). The stability of FN suggests that once again, RTs are probably the main driver of karyotype evolution in the *Nothoscordum* clade.

In an attempt to resolve the paraphyletic status of *Ipheion* and after a detailed morphological analysis, Sassone, Giussani & Guaglianone (2014) suggested recognizing yellow-flowered *Ipheion* as a separate genus, for which they resurrected *Beauverdia*. However, in our molecular phylogenetic reconstruction *Beauverdia* is embedded in *Nothoscordum*, making the latter genus paraphyletic (Fig. 2), causing an additional problem rather than a solution. Since all yellow-flowered species already have combinations in *Nothoscordum*, the most nomenclaturally stable solution is to include the yellow-flowered *Ipheion* spp. in *Nothoscordum* and put *Beauverdia* back into synonymy.

The most recent molecular phylogenetic studies of Leucocoryninae by Jara-Arancio *et al.* (2014) and Souza *et al.* (2015) discuss the genus *Latace* [formerly *Zoellnerallium*; Crosa (1975)], a taxon with a convoluted nomenclatural history, based on *N. andinum* (Poepp.) Kunth ex Fuentes (= *Latace volkmannii* Phil.) and presenting a distinctive karyological profile (Souza *et al.*, 2015, 2016; Fig. 4). Our expanded phylogenetic reconstruction presented here places *Latace* as sister to *Leucocoryne* (PP = 0.96; Fig. 2), as in previous studies. The topology recovered for *Leucocoryne* was compatible with the four main *Leucocoryne* clades found by Souza *et al.* (2015), although with weaker resolution and support.

#### GENOME DYNAMICS IN GILLIESIEAE

In contrast to the limited diversity in morphological characters, there is a wealth of cytogenetic and karyological traits that have probably played a key role in

diversification of the group. As stated in the results, our analyses reconstructed  $n = 6(5)/FN = 11(10)$  as the ancestral haploid and fundamental chromosome numbers for the tribe and for the MRCA of Gilliesiinae (clade A, Fig. 4). With the exception of *M. chilensis* ( $2n = 20$ ), extant representatives of the subtribe have chromosome numbers of  $2n = 12$  and  $14$ , supporting the split of the subtribe into two main clades. Based solely on chromosomal data, Goldblatt (1976) suggested that a reduction in chromosome number through RT (i.e. fusion) could have taken place, but more recently Escobar *et al.* (2012) suggested that an increase through chromosome fissions was more likely to have happened, taking into account that all species in the subtribe have the same FN. Our chromosome and FN modelling not only support this latter hypothesis, but also add further results suggesting that such chromosomal rearrangements did not have an impact on the FN, but were coupled with reductions in the overall GSs (clade A, Figs 3, 4). Changes in GS linked to RT events have been frequently reported, although the direction of GS change depends on the taxa analysed. For example, Enke, Fuchs & Gemeinholzer (2011) provided evidence of genome downsizing in *Crepis* L. coupled with descending dysploidy,  $x = 4$  to  $x = 3$ , and accompanied by a reduction in total karyotype length. In contrast, Mas de Xaxars *et al.* (2016) found both genome upsizing and downsizing in dysploid species of *Artemisia* L. ( $x = 9$  to  $x = 8$ ), suggesting a differential impact of genomic restructuring after RT events.

As mentioned above, although most *Miersia* spp. studied to date have  $2n = 12$  (Escobar *et al.*, 2012), *M. chilensis* stands out as a dramatic example of chromosomal restructuring, which has led to an increase of chromosome number ( $2n = 20$ ; Fig. S1C). The fact that  $2n = 12$  and  $2n = 20$  have the same FN provides solid evidence that RT has played a major role in reshaping the karyotype of this species, resulting in a karyotype dominated by acrocentric chromosomes (Fig. 4). We were unable to obtain samples from further *Miersia* spp., preventing us from confirming if the observed GS reduction in this species compared with *Speea* is a direct consequence of such a chromosomal reorganization.

Although there is some uncertainty in the reconstructed haploid number for the MRCA of Gilliesiinae, our chromosome modelling provides some support for a reduction of chromosome number and FN in the MRCA of Leucocoryninae (from  $n = 6$  to  $5$ , FN =  $10/11$  to  $8$ ; Fig. 4). Although this suggests that there were early RT events predating the diversification of this subtribe, it is notable that these changes did not have a significant impact on the GS of the MRCA of the subtribe (Fig. 3). It is nonetheless worth mentioning that, although subsequent chromosome losses, WGDs and potentially, also hybridization (e.g. *I. sessile*), led to

changes in chromosome number in clades C (blue-flowered *Ipheion* and *Tristagma*) and D (*Nothoscordum* and yellow-flowered *Ipheion*), only a single decrease in FN was reconstructed for the MRCA of clade C (Fig. 4). Certainly, in the case of blue-flowered *Ipheion*, aside from recent WGDs, RTs have played a significant role in driving chromosome evolution, leading not only to karyotypes mainly dominated by acrocentric chromosomes, as already pointed out Souza, Crosa & Guerra (2010), but also to dramatic reductions in their monoploid GS (Fig. 3). Changes in karyotype symmetry have been reported to not only influence average chromosome sizes, but also result in GS changes (e.g. Hidalgo *et al.*, 2008; Peruzzi, Leitch & Caparelli, 2009; Chochai *et al.*, 2012). However, it is unclear how often such changes lead to genomic expansions or contractions. In the present study, the dominance of acrocentric chromosomes arising from RTs was accompanied by substantial genome downsizing in blue-flowered *Ipheion*, which is also illustrated by their relatively smaller overall haploid karyotype length compared with their relatives [i.e. *I. uniflorum* ( $2n = 12$ , *c.* 53  $\mu\text{m}$ ), *I. sessile* ( $2n = 20$ , *c.* 90  $\mu\text{m}$ ), *Tristagma bivalve* ( $2n = 8$ , *c.* 90  $\mu\text{m}$ ), *Nothoscordum* spp. ( $2n = 10$ , 60–70  $\mu\text{m}$ ), *Leucocoryne* spp. ( $2n = 10$ , 90–150  $\mu\text{m}$ )] (Souza *et al.*, 2010; Jara-Arancio *et al.*, 2012; Fig. S1). Conversely, in *Paphiopedilum* Pfitzer (Chochai *et al.*, 2012) an increase in telocentric chromosomes arising by centromeric fission was followed by GS expansions and in Liliaceae, Peruzzi *et al.* (2009) observed that increased karyotype asymmetry was also frequently accompanied by increases in GS. Considering these observations, it is clear that RTs are an important evolutionary mechanism that not only has an impact on chromosome number and structure but can also drive changes in GS by triggering amplification or elimination of DNA. In fact, besides polyploidy, RTs are probably the main mechanism driving the contrasting GS diversity found in *Nothoscordum* and yellow-flowered *Ipheion* (clade D, Figs 3, 4).

The analysis of chromosome evolution in *Leucocoryne* highlighted the presence of several, distinctive mechanistic processes inferred to be responsible for generating chromosome number changes in the group (Fig. 4), and which are likely to contribute to the lack of proportional chromosome number increase between diploids ( $2n = 10$ ) and polyploids ( $2n = 18$ ). In an attempt to deal with this issue by adding the FN reconstruction, the model supported the presence of WGDs in the MRCA of the polyploid lineages, instead of the demi-duplication combined with chromosome gains inferred solely from using the haploid chromosome numbers in the probabilistic modelling of chromosome evolution (Fig. 4, clade F). This new approach has brought novel insights into the probable

evolutionary processes involved in chromosome number changes and highlights the utility of using FN instead of or as well as the haploid number to improve understanding of chromosome evolution in groups that have undergone recurrent chromosomal restructuring via RT. Besides that, our ancestral GS reconstruction revealed an initial GS expansion in the MRCA of the genus before the split into several clades, which was followed by subsequent increases (Fig. 3). Such results provide evidence for (1) a trend towards the accumulation of repetitive DNA and (2) little effect of WGD causing genome downsizing at the  $1Cx$ -level, which has been frequently reported in other polyploids (Leitch & Bennett, 2004). Setting polyploidy aside, the proliferation of repetitive DNA (including transposable elements and tandem repeats) is clearly a key driver of GS changes among species (Kejnovsky, Hawkins & Feschotte, 2012). For example, an extensive genomic analysis in Fabaeae (Fabaceae) revealed that the differential accumulation of repetitive DNA accounted for 85% of the differences in GS among species (Macas *et al.*, 2015). In summary, it is certainly the balance between amplification and efficiency in eliminating extra DNA that controls overall GS. Delving deeper into the genomes of Gilliesieae to determine the types of DNA sequences involved in generating GS changes in the different clades will no doubt provide further insights into the role that transposable elements and other repetitive DNAs have played in generating the GS diversity encountered.

## CONCLUSIONS

This study has compiled a comprehensive evolutionary framework for Gilliesieae, highlighting the importance of integrating cytogenetic and karyological information to understand better the evolution of this plant group in which recurrent chromosomal rearrangements have taken place. According to our results, RTs and polyploidy have not only been important for the diversification of the tribe, but can also be seen as triggers for generating the contrasting patterns of GS evolution uncovered in the group.

## ACKNOWLEDGEMENTS

We thank Tony Hall, Kit Strange, Sue Skinner and Graham Walters for providing samples and maintaining the RBGK living collections used in this study and Vikki Thompson for her assistance in the experimental work. O.H. was supported by a Marie Skłodowska-Curie Action program (CAPITULA – grant agreement n°657918).

## REFERENCES

- APG IV. 2016.** An update of the Angiosperm Phylogeny Group classification for the orders and families of flowering plants: APG IV. *Botanical Journal of the Linnean Society* **181**: 1–20.
- Bennetzen JL, Wang H. 2014.** The contributions of transposable elements to the structure, function, and evolution of plant genomes. *Annual Review of Plant Biology* **65**: 505–530.
- Block E. 1985.** The chemistry of garlic and onions. *Scientific American* **252**: 114–118.
- Castillo JA. 1986.** Notes on the cultivation of some South American bulbous plants. *Herbertia* **42**: 58–70.
- Chochai A, Leitch IJ, Ingrouille MJ, Fay MF. 2012.** Molecular phylogenetics of *Paphiopedilum* (Cypripedioideae; Orchidaceae) based on nuclear ribosomal ITS and plastid sequences. *Botanical Journal of the Linnean Society* **170**: 176–196.
- Clark J, Hidalgo O, Pellicer J, Liu H, Marquardt J, Robert Y, Christenhusz M, Zhang S, Gibby M, Leitch IJ, Schneider H. 2016.** Genome evolution of ferns: evidence for relative stasis of genome size across the fern phylogeny. *New Phytologist* **210**: 1072–1082.
- Crosa O. 1975.** *Zoellnerallium*, un género nuevo para la tribu Allieae (Liliaceae). *Darwiniana* **19**: 331–334.
- Dahlgren RMT, Clifford HT, Yeo PF. 1985.** *The families of the monocotyledons: structure, function, and taxonomy*. Berlin: Springer-Verlag.
- Doležel J, Bartoš J. 2005.** Plant DNA flow cytometry and estimation of nuclear genome size. *Annals of Botany* **95**: 99–110.
- Doležel J, Greilhuber J, Lucretti S, Meister A, Lysák MA, Nardi L, Obermayer R. 1998.** Plant genome size estimation by flow cytometry: inter-laboratory comparison. *Annals of Botany* **82** (Suppl. A): 17–26.
- Doležel J, Greilhuber J, Suda J. 2007.** Estimation of nuclear DNA content in plants using flow cytometry. *Nature Protocols* **2**: 2233–2244.
- Doyle JJ, Doyle JL. 1987.** A rapid DNA isolation procedure for small quantities of fresh leaf tissue. *Phytochemical Bulletin, Botanical Society of America* **19**: 11–15.
- Enke N, Fuchs J, Gemeinholzer B. 2011.** Shrinking genomes? Evidence from genome size variation in *Creptis* (Compositae). *Plant Biology* **13**: 185–193.
- Escobar I. 2012.** *Systematics of the tribe Gilliesieae Lindl. (Alliaceae), based on morpho-anatomical, cytological and molecular evidence*. Unpublished Biology Thesis, Universidad de Concepción.
- Escobar I, Ruiz E, Baeza C. 2012.** Karyotypic studies in species of Gilliesieae Lindl. (Gilliesioideae-Alliaceae) from central Chile. *Gayana Botanica* **69**: 240–250.
- Fay MF, Chase MW. 1996.** Resurrection of Themidaceae for the *Brodiaea* alliance, and recircumscription of Alliaceae, Amaryllidaceae and Agapanthoideae. *Taxon* **45**: 441–451.
- Fay MF, Chase MW. 2006.** Molecular studies of subfamily Gilliesioideae (Alliaceae). *Aliso* **22**: 367–371.
- Fay MF, Rudall PJ, Chase MW. 2006.** Molecular studies of subfamily Gilliesioideae (Alliaceae). *Aliso* **22**: 367–371.
- Fay MF, Rudall PJ, Sullivan S, Stobart KL, de Bruijn AY, Reeves G, Qamaruz-Zaman F, Hong W-P, Joseph J, Hahn WJ, Conran JG, Chase MW. 2000.** Phylogenetic studies of Asparagales based on four plastid DNA regions. In: Wilson KL, Morrison DA, eds. *Monocots: systematics and evolution*. Collingwood: CSIRO Publishing, 360–371.
- Ford CS, Ayres KL, Toomey N, Haider N, Van Alphen Stahl J, Kelly LJ, Wikström N, Hollingsworth PM, Duff RJ, Hoot SB, Cowan RS, Chase MW, Wilkinson MJ. 2009.** Selection of candidate coding DNA barcoding regions for use on land plants. *Botanical Journal of the Linnean Society* **159**: 1–11.
- García S, Leitch IJ, Anadon-Rosell A, Canela MÁ, Gálvez F, Garnatje T, Gras A, Hidalgo O, Johnston E, Mas de Xaxars G, Pellicer J, Siljak-Yakovlev S, Vallès J, Vitales D, Bennett MD. 2014.** Recent updates and developments to plant genome size databases. *Nucleic Acids Research* **42**: D1159–D1166.
- Givnish TJ, Pires JC, Graham SW, McPherson MA, Prince LM, Paterson TB, Rai HS, Roalson EH, Evans TM, Hahn WJ, Millam KC, Meerow AW, Molvray M, Kores PJ, O'Brien HE, Hall JC, Kress WJ, Sytsma KJ. 2006.** Phylogeny of the monocots based on the highly informative plastid gene *ndhF*: evidence for widespread concerted convergence. *Aliso* **22**: 28–51.
- Glick L, Mayrose I. 2014.** ChromEvol: assessing the pattern of chromosome number evolution and the inference of polyploidy along a phylogeny. *Molecular Biology and Evolution* **31**: 1914–1922.
- Goldblatt P. 1976.** New or noteworthy chromosome records in the angiosperms. *Annals of the Missouri Botanical Garden* **63**: 889–895.
- Greilhuber J, Doležel J, Lysák MA, Bennett MD. 2005.** The origin, evolution and proposed stabilization of the terms 'genome size' and 'C-value' to describe nuclear DNA contents. *Annals of Botany* **95**: 255–260.
- Greilhuber J, Leitch IJ. 2013.** Genome size and the phenotype. In: Leitch IJ, Greilhuber J, Doležel J, Wendel JF, eds. *Plant genome diversity, Volume 2: physical structure, behaviour and evolution of plant genomes*. Vienna: Springer-Verlag, 323–344.
- Guaglianone R. 1972.** Sinopsis de las especies de *Ipheion* Raf. y *Nothoscordum* Kunth (Liliaceae) de Entre Ríos y regiones vecinas. *Darwiniana* **17**: 159–240.
- Guindon S, Gascuel O. 2003.** A simple, fast, and accurate algorithm to estimate large phylogenies by maximum likelihood. *Systematic Biology* **52**: 696–704.
- Hidalgo O, García-Jacas N, Garnatje T, Romashchenko K, Susanna A, Siljak-Yakovlev S. 2008.** Extreme environmental conditions and phylogenetic inheritance: systematics of *Myopordon* and *Oligochaeta* (Asteraceae, Cardueae-Centaureinae). *Taxon* **57**: 769–778.
- Jara-Arancio P, Arroyo MTK, Guerrero PC, Hinojosa LF, Arancio G, Méndez MA. 2014.** Phylogenetic perspectives on biome shifts in *Leucocoryne* (Alliaceae) in relation to climatic niche evolution in western South America. *Journal of Biogeography* **41**: 328–338.
- Jara-Arancio P, Jara-Seguel P, Palma-Rojas C, Arancio G, Moreno R. 2012.** Karyological study in fifteen *Leucocoryne* taxa (Alliaceae). *Biología* **67**: 289–295.



- Jones K. 1998.** Robertsonian fusion and centric fission in karyotype evolution of higher plants. *The Botanical Review* **64**: 273–289.
- Katoh K, Kuma K-i, Toh H, Miyata T. 2005.** MAFFT version 5: improvement in accuracy of multiple sequence alignment. *Nucleic Acids Research* **33**: 511–518.
- Kejnovsky E, Hawkins JS, Feschotte C. 2012.** Plant transposable elements: biology and evolution. In: Wendel JF, Greilhuber J, Doležal J, Leitch IJ, eds. *Plant genome diversity: plant genomes, their residents and their evolutionary dynamics, 1st edn*. Vienna: Springer-Verlag, 17–33.
- Leitch IJ, Beaulieu JM, Chase MW, Leitch AR, Fay MF. 2010.** Genome size dynamics and evolution in monocots. *Journal of Botany* **2010**: article ID 862516.
- Leitch IJ, Bennett MD. 1997.** Polyploidy in angiosperms. *Trends in Plant Science* **2**: 470–476.
- Leitch IJ, Bennett MD. 2004.** Genome downsizing in polyploid plants. *Biological Journal of the Linnean Society* **82**: 651–663.
- Leitch IJ, Leitch AR. 2013.** Genome size diversity and evolution in land plants. In: Leitch IJ, Greilhuber J, Doležal J, Wendel JE, eds. *Plant Genome Diversity, Volume 2*. Vienna: Springer-Verlag, 307–322.
- Levan A, Emswellers SL. 1938.** Structural hybridity in *Nothoscordum fragrans*: and the origin of terminally attached chromosomes. *Journal of Heredity* **29**: 291–294.
- Loureiro J, Rodriguez E, Doležal J, Santos C. 2007.** Two new nuclear isolation buffers for plant DNA flow cytometry: a test with 37 species. *Annals of Botany* **100**: 875–888.
- Macas J, Novák P, Pellicer J, Čížková J, Koblížková A, Neumann P, Fuková I, Doležal J, Kelly LJ, Leitch IJ. 2015.** In depth characterization of repetitive DNA in 23 plant genomes reveals sources of genome size variation in the legume tribe Fabaeae. *PLoS One* **10**: e0143424.
- Maddison WP, Maddison DR. 2007.** *Mesquite: a modular system for evolutionary analysis. Version 2.01*.
- Mas de Xaxars G, Garnatje T, Pellicer J, Siljak-Yakovlev S, Vallès J, Garcia S. 2016.** Impact of dysploidy and polyploidy on the diversification of high mountain *Artemisia* (Asteraceae) and allies. *Alpine Botany* **126**: 35–48.
- Mayrose I, Barker MS, Otto SP. 2010.** Probabilistic models of chromosome number evolution and the inference of polyploidy. *Systematic Biology* **59**: 134–144.
- Meerow AW, Fay MF, Guy CL, Li Q-B, Qamaruz-Zaman F, Chase MW. 1999.** Systematics of Amaryllidaceae based on cladistic analyses of plastid *rbcl* and *trnL-F* sequence data. *American Journal of Botany* **86**: 1325–1345.
- Miller MA, Schwartz T, Pfeiffer P. 2010.** Creating the CIPRES Science Gateway for inference of large phylogenetic trees. Gateway Computing Environments Workshop (GCE), IEEE.
- Pellicer J, Fay MF, Leitch IJ. 2010.** The largest eukaryotic genome of them all? *Botanical Journal of the Linnean Society* **164**: 10–15.
- Penn O, Privman E, Landan G, Graur D, Pupko T. 2010.** An alignment confidence score capturing robustness to guide tree uncertainty. *Molecular Biology and Evolution* **27**: 1759–1767.
- Peruzzi L, Leitch IJ, Caparelli K. 2009.** Chromosome diversity and evolution in Liliaceae (Liliales, monocots). *Annals of Botany* **103**: 459–475.
- Pires JC, Maureira IJ, Givnish TJ, Sytsma KJ, Seberg O, Petersen G, Davis JI, Stevenson DW, Rudal IPJ, Fay MF, Chase MW. 2006.** Phylogeny, genome size, and chromosome evolution of Asparagales. *Aliso* **22**: 287–304.
- Pires JC, Sytsma KJ. 2002.** A phylogenetic evaluation of a bio-systematic framework: *Brodiaea* and related petaloid monocots (Themidaceae). *American Journal of Botany* **89**: 1342–1359.
- Posada D. 2008.** jModelTest: phylogenetic model averaging. *Molecular Biology and Evolution* **25**: 1253–1256.
- Rahn K. 1998.** Alliaceae. In: Kubitzki K, ed. *Flowering plants, monocotyledons: Liliaceae (except Orchidaceae)*. Berlin: Springer-Verlag, 70–78.
- Rambaut A, Drummond AJ. 2007.** *Tracer, version 1.5*. Available at: <http://evolve.zoo.ox.ac.uk/software.html>
- Revell LJ. 2012.** phytools: an R package for phylogenetic comparative biology (and other things). *Methods in Ecology and Evolution* **3**: 217–223.
- Ronquist F, Huelsenbeck J. 2003.** MrBayes 3: Bayesian phylogenetic inference under mixed models. *Bioinformatics* **19**: 1572–1574.
- Rudall PJ, Bateman RM, Fay MF, Eastman A. 2002.** Floral anatomy and systematics of Alliaceae with particular reference to *Gilliesia*, a presumed insect mimic with strongly zygomorphic flowers. *American Journal of Botany* **89**: 1867–1883.
- Samarakoon T, Wang SY, Alford MH. 2013.** Enhancing PCR amplification of DNA from recalcitrant plant specimens using a trehalose-based additive. *Applications in Plant Sciences* **1**: article ID 1200236.
- Sassone AB, Arroyo-Leuenberger SC, Giussani LM. 2014.** New circumscription of the tribe Leucocoryneae (Amaryllidaceae, Alliioideae). *Darwiniana* **2**: 197–206.
- Sassone AB, Belgrano MJ, Guaglianone ER. 2015.** The reinstatement of *Latace* Phil. (Amaryllidaceae, Alliioideae). *Phytotaxa* **239**: 253–263.
- Sassone AB, Giussani LM, Guaglianone ER. 2014.** *Beauverdia*, a resurrected genus of Amaryllidaceae (Alliioideae, Gilliesieae). *Systematic Botany* **39**: 767–775.
- Seberg O, Petersen G, Davis JI, Pires JC, Stevenson DW, Chase MW, Fay MF, Devey DS, Jørgensen T, Sytsma KJ, Pillon Y. 2012.** Phylogeny of the Asparagales based on three plastid and two mitochondrial genes. *American Journal of Botany* **99**: 875–889.
- Souza LG. 2012.** *Filogenia molecular, citotaxonomia e evolução cariotípica da subfamília Gilliesioideae (Alliaceae)*. Unpublished Biology Thesis, Universidade Federal de Pernambuco.
- Souza L, Crosa O, Guerra M. 2010.** Karyological circumscription of *Ipheion* Rafinesque (Gilliesioideae, Alliaceae). *Plant Systematics and Evolution* **287**: 119–127.
- Souza G, Crosa O, Guerra M. 2015.** Karyological, morphological, and phylogenetic diversification in *Leucocoryne* Lindl (Alliioideae, Amaryllidaceae). *Plant Systematics and Evolution* **301**: 2013–2023.
- Souza G, Crosa O, Speranza P, Guerra M. 2016.** Phylogenetic relations in tribe Leucocoryneae (Amaryllidaceae, Alliioideae)

and the validation of *Zoellnerallium* based on DNA sequences and cytomolecular data. *Botanical Journal of the Linnean Society* **182**: 811–824.

**Souza LG, Crosa M, Winge H, Guerra M. 2009.** The karyotype of *Nothoscordum arenarium* Herter (Gilliesioideae, Alliaceae): a populational and cytomolecular analysis. *Genetics and Molecular Biology* **32**: 111–116.

**Sun H, McLewin W, Fay MF. 2001.** Molecular phylogeny of *Helleborus* (Ranunculaceae), with an emphasis on the East AsianMediterranean disjunction. *Taxon* **50**: 1001–1018.

**Sun Y, Skinner DZ, Liang GH, Hulbert SH. 1994.** Phylogenetic analysis of *Sorghum* and related taxa using internal transcribed spacers of nuclear ribosomal DNA. *Theoretical and Applied Genetics* **89**: 26–32.

## SUPPORTING INFORMATION

Additional Supporting Information may be found in the online version of this article at the publisher's website:

**Figure S1.** Mitotic chromosome numbers and associated karyotypes in Gilliesieae: (Gilliesiinae) A. *Gethyum atropurpureum* ( $2n = 14$ ), B. *Gilliesia graminea* ( $2n = 14$ ), C. *Miersia chilensis* ( $2n = 20$ ), D. *Solaria miersioides* ( $2n = 14$ ), E. *Speea humilis* ( $2n = 12$ ). (Leucocoryninae) F. *Ipheion dialystemon* ( $2n = 10$ ), G. *Ipheion hirtellum* ( $2n = 10$ ), H. *Ipheion uniflorum* ( $2n = 12$ ), I. *Ipheion uniflorum* ( $2n = 24$ ), J. *Ipheion sessile* ( $2n = 20$ ), K. *Ipheion vittatum* ( $2n = 10$ ), L. *Leucocoryne coquimbensis* ( $2n = 10$ ), M. *Leucocoryne coquimbensis* ( $2n = 18$ ), N. *Leucocoryne ixioides* ( $2n = 18$ ), O. *Leucocoryne* cf. *narcissoides* ( $2n = 26$ ), P. *Leucocoryne narcissoides* ( $2n = 18$ ), Q. *Leucocoryne pauciflora* ( $2n = 10$ ), R. *Leucocoryne purpurea* ( $2n = 10$ ), S. *Leucocoryne purpurea* ( $2n = 14$ ), T. *Nothoscordum montevidense* subsp. *latitepalum* ( $2n = 32$ ), U. *Nothoscordum montevidense* subsp. *minarum* ( $2n = 32$ ), V. *Nothoscordum andicolum* ( $2n = 10$ ), W. *Tristagma bivalve* ( $2n = 8$ ), X. *Tristagma nivale* ( $2n = 8$ ), Y. *Tristagma porrifolium* ( $2n = 16$ ). Scale bar = 10  $\mu\text{m}$ .

**Appendix S1.** Primers used for *ndhF* sequencing. Diagram showing (a) the placement of the original *ndhF* primers (Pires & Sytsma, 2002) and (b & c) the primers designed to obtain *ndhF* sequences for *Speea humilis* and *Miersia chilensis*, with indication of their sequences.

**Appendix S2.** Chromosome numbers previously reported and published.
